# Supplementary material for: Postzygotic mosaicism in cerebral cavernous malformation
Source: PubMed Central journal article supplement — J Med Genet. 2019 Aug 24;57(3):212–6. doi: 10.1136/jmedgenet-2019-106182 (PMC7042965; doi:10.1136/jmedgenet-2019-106182), 2019-08-24
Supplement: jmedgenet-2019-106182supp002.pdf [file jmedgenet-2019-106182supp002.pdf]

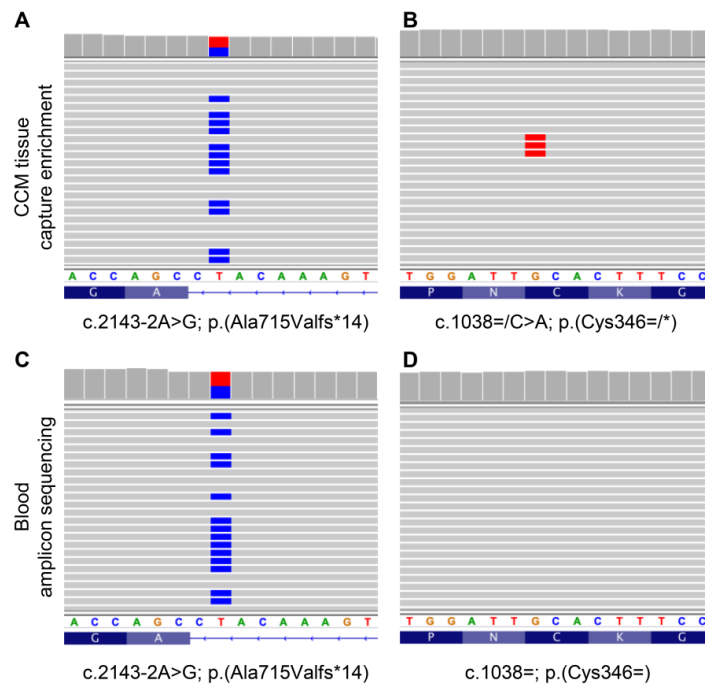

**Figure S1:** (A,B) Verification of the late postzygotic *CCM1* mutation in the cavernous malformation of the CCM index case. Nextera-Rapid-capture enrichment had been used for library preparation. (C,D) Result of the amplicon deep sequencing analysis of a lymphocyte-derived DNA sample of the index case. Sequence alignments are shown for the positions of the *CCM1* germline mutation (A,C) and the postzygotic *CCM1* nonsense variant (B,D).
